1  
2  
3  
4  
5  
6  
7  
8  
9  
10  
11  
12  
13  
14  
15  
16  
17  
18  
19  
20  
21  
22  
23  
24  
25  
26  
27  
28  
29  
30  
31  
32  
33  
34  
35  
36  
37  
38  
39  
40  
41  
42  
43  
44  
45

## **SimpylCellCounter: An Automated Solution for Quantifying Cells in Brain Tissue**

Aneesh Bal<sup>1</sup>, Fidel Maureira<sup>2</sup>, Amy A. Arguello<sup>1\*</sup>

<sup>1</sup>Psychology Dept, Michigan State University, Giltner Hall, Rm 213A,  
East Lansing, MI, 48825, USA

<sup>2</sup>Biological Systems Engineering, Washington State University, Paccar 351  
Pullman, WA, 99164-6120, USA

**\*Corresponding Author:**

Dr. Amy A. Arguello  
Michigan State University  
Department of Psychology  
Behavioral Neuroscience  
Giltner Hall, Rm 213A, 293 Farm Lane  
East Lansing, MI 48825  
Phone: 214-912-8911  
Email: [arguell5@msu.edu](mailto:arguell5@msu.edu)

**Acknowledgements:**

This work was supported by NIDA grant R00 DA037271. The authors have no conflicts of interest to disclose. Special thanks to BR Cho, J Gerena, AN Herrera Charpentier, DI Olekanma and K You, for their invaluable comments on the manuscript.

**Title length:** 10 words

**Abstract:** 197 words

**Main Text:** (2636 words; Intro-637, Results-909, Discussion-1090)

**Methods:** 1463 words

**Figures:** 5

**Supplementary Figures:** 2

**Supplementary Methods:** 399 words

46  
47  
48  
49  
50  
51  
52  
53  
54  
55  
56  
57  
58  
59  
60  
61  
62  
63  
64  
65  
66  
67  
68  
69

## ABSTRACT

**Rationale & Objective:** Manual quantification of activated cells can provide valuable information about stimuli-induced changes within brain regions; however, this analysis remains time intensive. Therefore, we created SimpylCellCounter (SCC), an automated method to quantify cells that express Cfos protein, an index of neuronal activity, in brain tissue and benchmarked it against two widely-used methods: OpenColonyFormingUnit (OCFU) and ImageJ Edge Detection Macro (IMJM).

**Methods:** In Experiment 1, manually-obtained counts were compared to those detected via OCFU, IMJM and SCC. The absolute error in counts (manual *versus* automated method) was calculated, and error types were categorized as false positives or negatives. In Experiment 2, performance analytics of OCFU, IMJM and SCC were compared. In Experiment 3, SCC performed analysis on images it was not trained on, to assess its general utility.

**Results & Conclusions:** We found SCC to be highly accurate and efficient in quantifying both cells with circular morphologies and those expressing Cfos. Additionally, SCC utilizes a new approach for counting overlapping cells with a pretrained convolutional neural network classifier. The current study demonstrates that SCC is a novel, automated tool to quantify cells in brain tissue, complementing current, open-sourced quantification methods designed to detect cells *in vitro*.

**Keywords:** Automated quantification, convolutional neural network, Cfos, brain tissue

70

## INTRODUCTION

71 Immediate early genes (IEGs) are rapidly transcribed and translated upon stimulus  
72 exposure, making them useful for post-behavioral, correlated readouts of cellular activity<sup>1</sup>. *Cfos*,  
73 a commonly studied IEG, is a proto-oncogene and member of the Fos family of transcription  
74 factors. *cfos* mRNA is transcribed within minutes of stimulus exposure and results in the  
75 cytoplasmic expression of Cfos protein 60-90 minutes later<sup>2</sup>. Behaviorally-induced increases in  
76 the number of Cfos-Immunoreactive (Cfos-IR) cells often suggest that these activated neuronal  
77 ensembles may contribute to specific behaviors. For example, characterization of the brain  
78 regions and cell types in which Cfos protein is increased has provided insight into the cell  
79 populations that contribute to learning and memory, drug addiction, obesity and fear  
80 conditioning<sup>3-11</sup>.

81 To analyze Cfos-IR cells, experimenters can choose between manual or automated  
82 methods for quantification. Brain slices are typically immunohistochemically stained for Cfos  
83 protein, resulting in round, light to dark-labeled cells. For manual quantification, cells can be  
84 counted in areas within a set microscopic field of view, or digital images of Cfos-stained tissue  
85 are obtained, imported and thresholded using software such as ImageJ to aid in counting<sup>4,5,12,13</sup>.  
86 While analysis with select software improves the reliability of manual quantification, an  
87 experimenter must still determine whether to count a dark-stained cell based on smoothness,  
88 clarity and size. Additionally, as the number of images increases, so does fatigue and the  
89 potential for increased errors in counts. Alternatively, existing automated methods can be used  
90 to quantify Cfos-like cells even though they are optimized for cell colony or tumor spheroid  
91 analysis. However, these algorithms can encounter problems with edge detection, contrast  
92 enhancement and denoising in brain tissue analysis<sup>14-18</sup>. Edge detection allows for clean  
93 segmentation of cells within colonies; however, this algorithm can detect false edges in  
94 background staining present with Cfos cells, which can obscure the cells of interest. While

95 contrast enhancement makes it easier to detect Cfos-IR cells, it can result in an overestimation  
96 of total cell count due to increased pixel intensity of dimly-stained cells. Lastly, denoising can  
97 remove background noise from Cfos images, but it can also lead to false negatives in images  
98 where Cfos-IR cells may be slightly out-of-focus. Therefore, to increase objectivity, reliability and  
99 minimize the time required to analyze images, an improved automated method for quantifying  
100 Cfos-like cells in brain tissue is required.

101 We created SimpylCellCounter (SCC), an efficient and accurate automated method for  
102 quantifying Cfos-IR cells in brain tissue. SCC utilizes binary thresholding and morphological  
103 functions from the open-sourced computer vision library OpenComputerVision<sup>19</sup>, implemented in  
104 Python. SCC allows a user to manually set parameters of darkness with basic thresholding, cell  
105 size and circularity by filtering out non-circular objects and counting only user-defined objects  
106 (**Fig 1**). SCC also utilizes OpenCV's highly-efficient, image processing functions to rapidly batch  
107 process large sets of digital images and incorporates a new approach to separating overlapping  
108 cells via a convolutional neuronal network.

109 To test the feasibility and efficiency of SCC, we compared our algorithm to two, highly-  
110 cited, open-sourced, cell colony-based automated quantification methods:  
111 OpenColonyFormingUnit<sup>17</sup> (OCFU) and ImageJ Edge Detection Macro<sup>16</sup> (IMJM). We chose  
112 OCFU and IMJM due to the similarities between Cfos-IR cells and the cell colony images  
113 analyzed in their respective publications. We used 192 images of Cfos-IR cells from the  
114 orbitofrontal cortex (OFC) of rats that underwent a cue-induced reinstatement paradigm where  
115 previously drug-paired cues elicited increased drug-seeking behaviors. We tested various  
116 metrics of performance between OCFU, IMJM and SCC and found that SCC quantified Cfos-IR  
117 cells with high accuracy when compared with manual analysis. SCC displayed the fastest  
118 quantification time of all automated methods tested and maintained accuracy and efficiency  
119 when threshold values and image size were changed. Lastly, we showed that SCC generalized

120 across multiple sets of images (fabricated Cfos images, *S. aureus* and *E. coli* colonies),  
121 indicating that it was not overfit to our laboratory's method of Cfos analysis.

## 122 RESULTS

### 123 ***Comparison of Cfos-IR counts between manual and automated methods (EXP 1)***

124 The number of Cfos-IR cells at several bregma points within the ventral OFC (vOFC)  
125 was quantified manually (white) or with three automated methods: OCFU (orange), IMJM (gray)  
126 or SCC (blue) (**Fig 2**). Specifically, a 4x6 ANOVA revealed no significant Method x Bregma  
127 interaction effect or main effects of Method or Bregma (**Fig 2A**). Therefore, all automated  
128 methods (OCFU, IMJM and SCC) displayed similar average number of Cfos-IR cells at each  
129 bregma point. An ANOVA of the total number of vOFC Cfos-IR cells quantified by each method  
130 did not reveal a significant effect. However, there was a trend ( $F_{3,28} = 2.51$ ,  $p = 0.079$ ) for an  
131 increased total number of cell counts by OCFU and IMJM, but not SCC, compared to manual.  
132 (**Fig 2B**).

133 Next, we calculated the difference in the number of Cfos-IR cells counted between  
134 manual and each automated method. ANOVA of the total absolute errors per method revealed a  
135 significant effect ( $F_{2, 141} = 30.41$ ,  $p < 0.0001$ ). Post-hoc analysis revealed that the absolute error  
136 between manual and automated counts determined by SCC was significantly less than both  
137 OCFU and IMJM (Bonferroni's test,  $p < 0.01$ ). Therefore, compared to IMJM and OCFU, SCC  
138 had the least difference in cell counts compared to manual analysis (**Fig 2C**).

139 To further explore the types of errors, we conducted an analysis of false positives (**Fig**  
140 **2D**) and false negatives (**Fig 2E**) for all automated methods. ANOVA of false positives revealed  
141 a significant effect, ( $F_{2,87} = 22.37$ ,  $p < 0.0001$ ), with SCC displaying a significantly lower  
142 magnitude of false positives compared to OCFU and IMJM (Bonferroni's test,  $p < 0.01$ ).  
143 Additionally, an ANOVA of false negatives revealed a significant effect, ( $F_{2,87} = 5.27$ ,  $p < 0.01$ )

144 with SCC detecting significantly lower magnitude of false negatives compared to IMJM  
145 (Bonferroni's test,  $p < 0.01$ ) but not OCFU. Therefore, SCC minimized detection of false positives  
146 and negatives, resulting in a smaller number of absolute errors compared to OCFU and IMJM.  
147 Examples of types of false positives (plus symbol) and negatives (carrot symbol) compared to  
148 manual counts (magenta circles) are depicted for each automated method (**Fig 3**).

149 Lastly, the number of Cfos-IR cells quantified with SCC was correlated with manual  
150 counts (**Fig 2F**). Linear regression analysis of manual vs automated counts revealed the  
151 following: manual vs OCFU,  $p < 0.0001$  with a regression equation of  $y = 0.552x + 20.75$ ; manual  
152 vs IMJM,  $p < 0.0001$  with a regression equation of  $y = 0.540x + 28.68$ ; manual vs SCC,  $p < 0.0001$   
153 with a regression equation of  $y = 0.948x + 0.31$ . Therefore, SCC detected similar cell counts per  
154 image when compared to manual analysis.

#### 155 ***Differences in automated method performance (EXP 2)***

156 We compared the performance analytics of OCFU, IMJM and SCC at analyzing Cfos-IR  
157 cells (**Fig 4**). We determined the average time (sec) for each automated method to quantify one  
158 image (**Fig 4A**). An ANOVA of time per method revealed a significant effect ( $F_{2,87} = 1292$ ,  
159  $p < 0.0001$ ), with SCC exhibiting the lowest analysis time (Bonferroni's test,  $p < 0.01$ ). The time  
160 required to quantify a set of images as a function of image size was also compared (**Fig 4B**). A  
161 3x7 repeated measures ANOVA of analysis time per method revealed a significant Method x  
162 Size interaction effect ( $F_{12,522} = 2271$ ,  $p < 0.0001$ ) and a significant main effect of Size  
163 ( $F_{6,522} = 9773$ ,  $p < 0.0001$ ), with SCC exhibiting the lowest time to analyze one image across size  
164 groups (Bonferroni's test,  $p < 0.01$ ). Therefore, all 3 automated methods display increases in  
165 processing time with larger image size. While SCC's processing speed increases as a function  
166 of image size, it exhibits the most rapid analysis compared to OCFU and IMJM.

167 Lastly, we compared the absolute error of each automated method as the threshold  
168 varied as a percentage of mean pixel intensity per image (**Fig 4C**). A 3x4 repeated measures  
169 ANOVA of absolute errors per method revealed a significant Method x Threshold group  
170 interaction effect ( $F_{6,126} = 9.11$ ,  $p < 0.0001$ ) and a significant main effect of Threshold group ( $F_{3,126}$   
171  $= 66.08$ ,  $p < 0.0001$ ), with SCC displaying the lowest absolute error across threshold groups  
172 (Bonferroni's test,  $p < 0.01$ ). Therefore, SCC displays robust accuracy even as threshold  
173 percentage and background noise increases.

### 174 ***Determining SCC's performance on different image types (EXP 3)***

175 We compared ground truth (white) to SCC (blue) counts on three different types of  
176 images: fabricated Cfos-images, *S. aureus* and *E. coli* cell colonies (**Fig 5**). Independent  
177 samples t-test of average ground truth counts vs SCC counts revealed no significant differences  
178 (**Fig 5B**,  $t_{28} = 0.13$ ,  $p = 0.89$ ). Linear regression of ground truth vs SCC counts revealed a  
179 significant correlation (**Fig 5C**,  $p < 0.0001$ ) and regression equation of  $y = 0.991x - 0.82$ .  
180 Independent samples t-test of average ground truth counts vs SCC counts revealed no  
181 significant differences between groups (**Fig 5E**,  $t_{26} = 0.11$ ,  $p = 0.91$ ). Linear regression of ground  
182 truth vs SCC counts revealed a significant correlation (**Fig 5F**,  $p < 0.0001$ ) and regression  
183 equation of  $y = 0.968x + 0.10$ . Independent samples t-test of average ground truth counts vs  
184 SCC counts revealed no significant differences between groups (**Fig 5H**,  $t_{28} = 0.20$ ,  $p = 0.84$ ).  
185 Linear regression of ground truth *E. coli* counts vs SCC counts revealed a significant correlation  
186 (**Fig 5I**,  $p < 0.0001$ ) and regression equation of  $y = 0.943x + 0.39$ . Taken together, these results  
187 show that SCC counts matched ground truth counts for fabricated Cfos images (**Fig 5A-C**), *S.*  
188 *aureus* images (**Fig 5D-F**) and *E. coli* colonies (**Fig 5G-I**). Therefore, SCC accurately quantifies  
189 cell types that it was not trained on, indicating generalizability.

190

191

192

## DISCUSSION

193

194 The present study aimed to create an automated method to analyze cell number in brain  
195 tissue, to complement existing open-sourced methods designed for cell colony analysis. We  
196 created SimpylCellCounter (SCC) and used this automated method to quantify the number of  
197 Cfos-immunoreactive (IR) cells in brain tissue. We analyzed several variables and found that  
198 SCC 1) detected a similar magnitude of cells as manual analysis, 2) displayed low absolute  
199 errors, false positives and negatives compared to two widely-used automated methods,  
200 OpenColonyFormingUnit (OCFU) and ImageJ Edge Detection Macro (IMJM) and 3) was rapid  
201 at processing images of increasing size and 4) detected similar number of cells across varying  
202 thresholds suggesting that this algorithm can maintain accuracy when this parameter changes.  
203 Importantly, SCC introduces a novel approach to detect and quantify overlapping cells with the  
204 use of Hu Moments and a convolutional neural network (CNN). Use of a pretrained CNN affords  
205 rapid analysis along with high levels of accuracy at quantifying overlapping cells. For binarized  
206 objects with significant overlap, it is difficult to judge whether there are multiple cells or simply  
207 one cell with irregular morphological features. Our CNN implementation is optimal for such a  
208 task since it learns morphological features of binarized single or multiple cells, making input  
209 data classification with a pretrained network a quick process.

210 SCC-driven analysis of Cfos-IR cell number was correlated with manual counts. We  
211 previously found that rats presented with a drug-associated cue displayed an increased number  
212 of Cfos-IR cells in the ventral orbitofrontal cortex (vOFC). Specifically, when compared to  
213 previous manually-analyzed data, SCC detected similar numbers of total Cfos-IR cells (**Fig 2B**)  
214 and similar numbers of counts in anterior-posterior divisions of the OFC (**Fig 2A**). Furthermore,  
215 there is a near perfect match of cell counts analyzed manually vs with SCC (**Fig 2F**). Taken  
216 together, these data indicate that SCC is comparable to manual analysis, accurate at providing



217 objective estimates of cell number and efficient since less time is needed to determine whether  
218 a cell should be counted based on size, shape and pixel intensity.

219 We also compared manual analysis of cell counts to two, commonly-used algorithms OCFU  
220 and IMJM, which analyze cell number in colonies but can also be used for other applications  
221 requiring detection of circular objects. We did not benchmark SCC against general cell analysis  
222 methods like CellProfiler<sup>20</sup> and Ilastik<sup>21</sup>, since they require the user to have a working  
223 understanding of computer vision algorithms to create a custom pipeline for analysis prior to  
224 inputting data, making these solutions less user-friendly.

225 We wanted to examine whether OCFU, IMJM and SCC detected similar numbers of cells.  
226 While not significant, there was a trend for OCFU and IMJM to result in higher total numbers of  
227 Cfos-IR cells in the vOFC and across bregmas, compared to manual and SCC (**Fig 2B**). When  
228 we compared the absolute error between manual and automated counts, we found that SCC  
229 resulted in significantly less errors than OCFU and IMJM (**Fig 2C**). We then aimed to  
230 understand the potential reasons for differences in cell number between manual, OCFU, IMJM  
231 and SCC methods. Examples of false negatives occurred where OCFU filtered out Cfos-IR cells  
232 that were oblong shaped or blurry. False positives may have occurred when cells displayed a  
233 color gradient (half of cell dark, other half light), resulting in a cell being counted twice (**Fig 3,**  
234 **OCFU**). Examples of false negatives in IMJM occurred when contrast enhancement created a  
235 loss of difference in pixel intensity in a cell vs background, resulting in edge detection failure and  
236 omission of neighboring positive cells. Additionally, filtering procedures may alter cell  
237 morphology, making it difficult for IMJM's watershed algorithm to effectively separate certain  
238 overlapping cells, leading to lower counts. (**Fig 3, IMJM**). False positives could result from  
239 errors where background, noise-like particles with correct cell shape are erroneously filled with  
240 IMJM's "fill holes" step, leading to increased counts.

241 SCC is a brain-specific algorithm that complements currently-available, automated  
242 quantification methods, offering improvements in speed of digital analysis. SCC's simple  
243 processing scheme only includes functions that are essential to separating Cfos-IR cells from  
244 background and noise, such as thresholding, dilation and erosion. Similar to OCFU and IMJM,  
245 SCC initially processes an entire digital image, until step 4 of the algorithm (**Fig 1A**), when it  
246 then computes Hu Moments to independently and sequentially quantify circularity in a contour-  
247 wise fashion. Therefore, SCC decides which objects demand additional time for analysis: non-  
248 circular contours are input into the CNN to test for overlapping cells while circular objects are  
249 simply counted, thereby reducing processing times (**Fig 4A**). Furthermore, we also determined  
250 that SCC is consistently faster at processing increasingly larger images (**Fig 4B**) and maintains  
251 a high level of count accuracy even as threshold values change (**Fig 4C**). As thresholds  
252 approach the mean pixel intensity of the image being processed, the absolute error (manual –  
253 automated) consistently increases for all automated methods. However, SCC is able to  
254 minimize this error, likely due to the dynamic filtering operations: as threshold approaches the  
255 mean, objects are more rigorously filtered by increasing iterations of dilation and erosion.

256 Lastly, we aimed to determine whether the SCC algorithm could also accurately analyze cell  
257 counts from other lab data. To do this, we utilized data from artificially-constructed Cfos-IR  
258 images that contained cells in varying size and intensity. SCC exhibits accurate performance, as  
259 shown by raw averages and correlation (**Fig 5A-C**). Furthermore, we utilized sample images  
260 obtained from the OCFU database from *S. aureus* and *E. coli* image samples. SCC displayed  
261 strong correlations between manual vs automated detection method, demonstrating that our  
262 algorithm can detect circular, non-Cfos-IR, objects including cells that are pigmented and from  
263 *in vitro* mediums (**Fig 5D-F, G-I**). These data demonstrate that SCC is not overfit to the data it  
264 was trained on and can likely generalize to other datasets collected by different labs. With that

265 being said, even though SCC can count other types of cells in bacterial cultures, SCC is built for  
266 Cfos-like images.

267 In the future, SCC can potentially be used to effectively analyze viral or fluorescent images.  
268 For example, colorimetric Cfos images have dark cells and a lighter background, whereas  
269 fluorescently-labeled cells would be lighter than the background. Therefore, the user can simply  
270 invert the threshold in SCC and proceed with the same processing chain. Given that the SCC  
271 code is flexible, a user can easily adjust parameters of threshold, size and filtering to fit their  
272 specific application. SCC is an accurate, efficient and novel automated tool to quantify Cfos-like  
273 cells in brain tissue and can be extended to analysis of cells with circular morphologies.

## 274 **MATERIALS & METHODS**

### 275 ***Animals and Behavioral Experiments***

276 We utilized a previously published data set in which the number of Cfos-IR cells was  
277 increased with exposure to cocaine-associated cues<sup>22</sup>. Male Sprague-Dawley rats (Envigo Inc,  
278 Haslett, MI, N=20) were housed under reversed lighting conditions (lights off 7am, on 7pm) and  
279 were fed 20-25g of standard irradiated rodent chow with water available *ad libitum*. Protocols  
280 were approved by the Institutional Animal Care and Use Committee (IACUC) at Michigan State  
281 University (MSU) and followed the National Research Council's Guide for the Care and Use of  
282 Laboratory Rats. Intravenous catheters were subcutaneously implanted into the right jugular  
283 vein. Following 5 days of recovery, rats underwent cocaine self-administration and extinction  
284 training, followed by drug-seeking tests without cue (EXT) or with cue presentation (TEST).  
285 After tests, rats were sacrificed and perfused, brains were extracted and cryoprotected and  
286 sectioning and image processing was conducted as previously described<sup>22</sup>. We obtained a total  
287 of 192 images of Cfos-stained sections from lateral and ventral OFC (lOFC, vOFC respectively)  
288 from six bregma points spanning the A-P axis (+5.12 to +3.72), from which Cfos-IR cells were

289 quantified<sup>22</sup>. In the current study, we compared counts that were previously analyzed manually,  
290 with the automated methods OCFU, IMJM and SCC.

### 291 ***Image Processing Steps and Parameter Selection***

292 **Manual:** We imported images into ImageJv1.51<sup>13</sup>, converted them to 8-bit grayscale and  
293 applied threshold values with the top value set to 115 and the bottom set to 120. These  
294 adjustments created a round, red contour around the darkest cells on each image, which  
295 assisted experimenters to judge the circularity and size of cells during counting (**Fig 1A**).

296 **OCFU:** We utilized the OCFU graphic user interface application for all experiments. We  
297 set two parameters: radius size (minimum at 10 pixels, maximum at auto-max) and threshold to  
298 61. Since OCFU's threshold does not directly correspond to pixel intensity, we incorporated a  
299 standardization procedure (Supplementary Methods & Supplementary **Fig S2**) by which a  
300 threshold value of 61 in OCFU was equivalent to the value of 115 in manual, IMJM and SCC.  
301 (**Fig 1A**).

302 **IMJM:** This algorithm contained numerous parameters that were local to ImageJ  
303 functions but not common to OCFU or SCC. Therefore, we used parameters for IMJM provided  
304 in<sup>16</sup>. We modified the contrast enhancement value to 0.001 and circularity value to 0.8-1.0 (**Fig**  
305 **1A**). We also added a binary threshold step and implemented IMJM in MATLAB's ImageJ  
306 wrapper, MIJI<sup>23</sup>. The exact MIJI workflow can be found at:

307 [https://github.com/aneeshbal/SimplCellCounter/blob/master/recreationFunctions/AutoQMS\\_MI](https://github.com/aneeshbal/SimplCellCounter/blob/master/recreationFunctions/AutoQMS_MIJI.m)  
308 [JI.m](https://github.com/aneeshbal/SimplCellCounter/blob/master/recreationFunctions/AutoQMS_MIJI.m)

309 **SCC:** Binary Mask- In the first processing step, the user selects the folder of images to  
310 be analyzed then SCC applies a binary threshold to 8-bit images, converting all pixel values  
311 lower than the set threshold to black and those higher than threshold to white. After  
312 thresholding, shapeless, poorly-connected, sparse groups of black pixels represent background,

313 noise-like particles while round, well-connected, dense collections of black pixels represent  
314 Cfos-IR cells.

315 Dilation & Erosion - In the dilation step, white pixels (background) engulf adjacent black  
316 pixels (cells of interest + noise). Consequently, small, noise-like objects are completely engulfed  
317 by white pixels and become part of the background. To recover an object's original morphology,  
318 which is altered with dilation, SCC performs an erosion step (opposite of dilation). Dilation and  
319 erosion steps occur for a set number of iterations, determined by the user-set threshold to mean  
320 pixel intensity ratio (MPI). As the threshold-MPI ratio approaches 1, the magnitude of noise-like  
321 particles exponentially increases, therefore SCC accordingly increases the iterations of these  
322 steps resulting in a stringent filtering process.

323 Object Selection- Following dilation and erosion, SCC discards objects based on size  
324 criteria by drawing contours over all the objects on the filtered binary mask, calculates the  
325 zeroth-order moment of each contour (area) and discards all contours with a smaller area than  
326 the user-set criteria (pixel radius converted to area). Following this step, certain objects may be  
327 overlapping, obscuring the total cell count. Rather than performing the popular watershed  
328 segmentation algorithm to separate overlapping objects, which can alter cell morphology<sup>24</sup>, we  
329 utilized Hu Moments to compute contour circularity<sup>25,26</sup>. Hu Moments are orientation- and scale-  
330 invariant properties intrinsic to shapes. Perfectly circular contours resulted in a log-adjusted first  
331 Hu Moment value of ~0.79. We observed that a single contour surrounds the perimeter of  
332 overlapping objects, resulting in a non-circular contour with a first Hu Moment value typically  
333 below ~0.76. SCC then applies a pretrained convolutional neural network (CNN) classifier  
334 (Supplementary Methods & Supplementary **Fig S1**) to determine the number of cells within non-  
335 circular contours and adds these to the number of circular contours. For all experiments, radius  
336 size was set to 10 pixels, threshold was 115 and circularity was 0.7 unless otherwise stated.  
337 **(Fig 1A).**

### 338 ***Experiment 1: Accuracy and Feasibility of Automated Methods***

339 Using 192 images of vOFC brain sections from TEST rats, we compared the average  
340 number of Cfos-IR cells per bregma point, and the total number of Cfos-IR cells. Next, we  
341 calculated the absolute error of cell counts between manual vs each automated method (OCFU,  
342 IMJM, SCC) and then conducted an error analysis in a subset of images. For each manually-  
343 counted cell, the number of false positives (cells counted by automated methods but not  
344 manually) and false negatives (cells counted manually but not by automated methods) was  
345 determined. Last, we correlated the number of counts detected via manual vs each automated  
346 method and conducted a linear regression analysis.

### 347 ***Experiment 2: Performance Analytics of Automated Methods***

348 Using 30 randomly selected Cfos-IR images from EXT and TEST subjects (IOFC and  
349 vOFC), we calculated the average time (sec) to process one image (1920 x 1460 pixels), then  
350 resized each image (by factors of 0.5, 1, 2, 4, 6, 8, 10) and calculated the resulting image size:  
351 ***New Image Size*** =  $\frac{\text{Original Image Size}}{\text{Resize Factor}}$ . For each resize factor, we calculated the average time  
352 (sec) for each automated method to process 30 images. Lastly, using 15 randomly-selected  
353 Cfos-IR images from EXT and TEST subjects (IOFC and vOFC), we calculated the absolute  
354 error for each automated method as a function of a changing threshold. For each image, we  
355 multiplied the MPI by each threshold factor (0.7, 0.75, 0.8 or 0.85) to obtain the final threshold  
356 value. We then quantified Cfos-IR cells and the absolute error for each image between manual  
357 vs automated methods. We did not use the command line interface for OCFU but instead  
358 quantified the image processing time on the graphic user interface (GUI) from the input image  
359 until a cell count was displayed.

### 360 ***Experiment 3: Overfitting Analysis for SCC***

361 We obtained 3 separate datasets of non-Cfos images including: 1) fabricated Cfos  
362 images (n=15), 2) *S. aureus* colony images (n=14) and 3) *E. coli* colony images (n=15). We  
363 created 15 fabricated Cfos images, using a Python implementation of OpenCV by placing a  
364 random number of circles (between 5 and 100) of varying pixel intensities and sizes on a gray  
365 background that closely resembles the background staining of Cfos images. Additionally, we  
366 obtained cell colony images of *S. aureus* and *E. coli* from the open-sourced database provided  
367 by Dr. Quentin Geissman at the following link: <http://opencfu.sourceforge.net/samples.php>. The  
368 source images contain agar plates but since SCC does not have a region of interest selector,  
369 images were cropped to include only a subset of contents inside agar plates. The final images  
370 used are provided at:  
371 <https://github.com/aneeshbal/SimplCellCounter/tree/master/imageSamples>.

372 For fabricated Cfos-IR images, we calculated ground truth counts and compared them to  
373 SCC counts. Ground truth here was defined as the number of cells that met the user-defined,  
374 size and threshold criteria, and since these images were fabricated, the exact number of cells  
375 was pre-determined. We calculated the average counts per image and performed a correlation  
376 and linear regression of ground truth vs SCC counts. For cell colony images, we defined ground  
377 truth as the number of cells counted by OCFU, given that it was optimized for cell colony  
378 images. We then repeated the analyses performed on the fabricated Cfos-IR images on *S.*  
379 *aureus* and *E. coli* image samples.

### 380 **Code Availability**

381 All code is available: <https://github.com/aneeshbal/SimplCellCounter>

### 382 **Statistics**

383 For EXPs 1 & 2, repeated measures analysis of variance (ANOVA) were conducted for  
384 mean cell counts across bregma points comparing manual vs automated methods (within-

385 subject factor = bregma, between-subject factor = method), time per automated method across  
386 image size groups (within-subject = image size, between-subject = method) and absolute errors  
387 by automated methods across threshold factor (within-subject = threshold group, between-  
388 subject = method). One-way ANOVAs were conducted to explore differences in total cell counts,  
389 absolute errors, false positives and negatives across automated methods and time taken to  
390 analyze images per automated method. Additionally, linear regression was conducted to  
391 examine correlations between manual vs automated counts and ground truth vs SCC counts.  
392 For EXP 3, independent t-tests were conducted to examine differences between ground truth vs  
393 SCC counts. For all statistical and post-hoc tests, alpha was set to 0.05.

394

395



396

## REFERENCES

- 397 1. Cruz, F. C., Javier Rubio, F. & Hope, B. T. Using c-fos to study neuronal ensembles in  
398 corticostriatal circuitry of addiction. *Brain Res.* **1628**, 157–173 (2015).
- 399 2. Herrera, D. & Robertson, H. Activation of c-fos in the Brain. *Prog. Neurobiol.* **50**, 83–107  
400 (1996).
- 401 3. Ruhl, T., Zeymer, M. & von der Emde, G. Cannabinoid modulation of zebrafish fear learning  
402 and its functional analysis investigated by c-Fos expression. *Pharmacol. Biochem. Behav.*  
403 **153**, 18–31 (2017).
- 404 4. Kufahl, P. R. *et al.* c-Fos expression associated with reinstatement of cocaine-seeking  
405 behavior by response-contingent conditioned cues. *Synapse* **63**, 823–835 (2009).
- 406 5. Neisewander, J. L. *et al.* Fos protein expression and cocaine-seeking behavior in rats after  
407 exposure to a cocaine self-administration environment. *J. Neurosci.* **20**, 798–805 (2000).
- 408 6. Venniro, M. *et al.* The Anterior Insular Cortex→Central Amygdala Glutamatergic Pathway Is  
409 Critical to Relapse after Contingency Management. *Neuron* **96**, 414–427.e8 (2017).
- 410 7. Venniro, M. *et al.* Volitional social interaction prevents drug addiction in rat models. *Nat.*  
411 *Neurosci.* **21**, 1520–1529 (2018).
- 412 8. Khoo, S. Y.-S., Clemens, K. J. & McNally, G. P. Palatable food self-administration and  
413 reinstatement are not affected by dual orexin receptor antagonism. *Prog.*  
414 *Neuropsychopharmacol. Biol. Psychiatry* **87**, 147–157 (2018).
- 415 9. Sinclair, E. B., Hildebrandt, B. A., Culbert, K. M., Klump, K. L. & Sisk, C. L. Preliminary  
416 evidence of sex differences in behavioral and neural responses to palatable food reward in  
417 rats. *Physiol. Behav.* **176**, 165–173 (2017).
- 418 10. Cho, J.-H., Rendall, S. D. & Gray, J. M. Brain-wide maps of Fos expression during fear  
419 learning and recall. *Learn. Mem.* **24**, 169–181 (2017).
- 420 11. Vetere, G. *et al.* Chemogenetic Interrogation of a Brain-wide Fear Memory Network in Mice.  
421 *Neuron* **94**, 363–374.e4 (2017).
- 422 12. Hamlin, A. S., Clemens, K. J. & McNally, G. P. Renewal of extinguished cocaine-seeking.  
423 *Neuroscience* **151**, 659–670 (2008).
- 424 13. Schneider, C. A., Rasband, W. S. & Eliceiri, K. W. NIH Image to ImageJ: 25 years of image  
425 analysis. *Nat. Methods* **9**, 671–675 (2012).
- 426 14. Siragusa, M., Dall’Olio, S., Fredericia, P. M., Jensen, M. & Groesser, T. Cell colony counter  
427 called CoCoNut. *PLoS One* **13**, e0205823 (2018).
- 428 15. Bewes, J., Suchowerska, N. & McKenzie, D. Automated cell colony counting and analysis  
429 using the circular Hough image transform algorithm (CHiTA). *Phys. Med. Biol.* **53**, 5991–  
430 6008 (2008).
- 431 16. Choudhry, P. High-Throughput Method for Automated Colony and Cell Counting by Digital  
432 Image Analysis Based on Edge Detection. *PLoS One* **11**, e0148469 (2016).

- 433 17. Geissmann, Q. OpenCFU, a new free and open-source software to count cell colonies and  
434 other circular objects. *PLoS One* **8**, e54072 (2013).
- 435 18. Guzmán, C., Bagga, M., Kaur, A., Westermarck, J. & Abankwa, D. ColonyArea: an ImageJ  
436 plugin to automatically quantify colony formation in clonogenic assays. *PLoS One* **9**,  
437 e92444 (2014).
- 438 19. Bradski, G. The OpenCV Library. *Dr. Dobb's Journal of Software Tools* **120**, 122–125  
439 (2000).
- 440 20. Carpenter, A. E. *et al.* CellProfiler: image analysis software for identifying and quantifying  
441 cell phenotypes. *Genome Biol.* **7**, R100 (2006).
- 442 21. Sommer, C., Straehle, C., Kothe, U. & Hamprecht, F. A. Ilastik: Interactive learning and  
443 segmentation toolkit. in **May 2011**, 230–233 (IEEE, 2011).
- 444 22. Bal, A., Gerena, J., Olekanma, D. I. & Arguello, A. A. Neuronal activation in orbitofrontal  
445 cortex subregions: Cfos expression following cue-induced reinstatement of cocaine-seeking  
446 behavior. *Behav. Neurosci.* **133**, 489–495 (2019).
- 447 23. Sage, D., Prodanov, D., Tinevez, J.-Y. & Schindelin, J. MIJ: Making Interoperability  
448 Between ImageJ and Matlab Possible. (2012).
- 449 24. Meyer, F. The watershed concept and its use in segmentation□: a brief history. *arXiv*  
450 (2012).
- 451 25. Ming-Kuei Hu. Visual pattern recognition by moment invariants. *IEEE Trans. Inform. Theory*  
452 **8**, 179–187 (1962).
- 453 26. Huang, Z. & Leng, J. Analysis of Hu's Moment Invariants on Image Scaling and Rotation.  
454 *IEEE Pulse* **7**, 476–480 (2010).

455

456

457

458

459

460

461

462

463

## FIGURE LEGENDS

464 **Figure 1: Schematic of Automated Processing Steps. A)** Selected parameters for threshold  
465 (pixel intensity), object size (pixel radius) and object circularity for Manual,  
466 OpenColonyFormingUnit (OCFU), ImageJ Edge Detection Macro (IMJM) and  
467 SimpylCellCounter (SCC) of Cfos-immunoreactive (Cfos-IR) cells. **B)** Image processing  
468 sequence for SCC: 1) loads images and converts to 8-bit grayscale making all pixel intensities  
469 range between 0 and 255, 2) performs global threshold based on a user-set value and creates a  
470 binarized mask, 3) performs morphological operations on the binary mask to filter out noise-like  
471 particles, 4) further selects for objects based on size, circularity and cell overlap, leading to a  
472 final cell count.

473 **Figure 2: Comparison of Manual vs Automated Quantification Methods.** Manual vs  
474 automated quantification of Cfos-IR cells obtained from the ventral orbitofrontal cortex (vOFC) of  
475 rats that underwent cue-induced reinstatement of drug-seeking behavior. The automated  
476 methods included: OCFU (orange), IMJM (gray) and SCC (blue). **A)** Average number of Cfos-IR  
477 cells counted by manual vs automated methods over several points along the anterior-posterior  
478 axis (bregma + 5.12 to + 3.72) of the vOFC, n = 96 total images per method. **B)** Average  
479 number cell counts. **C)** Average absolute error:  $ABS(Manual\ counts - Automated\ counts)$ , **D)**  
480 Average number of false positives, number of cells detected by automated methods that were  
481 not counted manually, n = subset of 30, **E)** Average number of false negatives, number of cells  
482 counted manually that were not detected by automated methods, n = subset of 30 images, **F)**  
483 Correlation of manual vs automated counts. Manual correlated with OCFU,  $p < 0.001$  and  
484 regression of  $y = 0.552x + 20.75$ ; Manual correlated with IMJM,  $p < 0.001$  and regression of  $y =$   
485  $0.540x + 28.68$ ; Manual correlated with SCC,  $p < 0.001$  and regression of  $y = 0.948x + 0.31$ .

486

487 **Figure 3: Characterization of Automated Quantification.** Comparison of 3 images with  
488 manual vs automated method with examples of count classification: OCFU (orange), IMJM  
489 (gray) and SCC (blue). The number of detected cells is displayed in the upper right corner of  
490 each image. Correctly counted cells (compared to manual) are depicted in magenta circles.  
491 False positives are depicted by a plus symbol while false negatives are depicted by the carrot  
492 symbol.

493 **Figure 4: Performance Analytics of Automated Methods.** OCFU (orange), IMJM (gray) and  
494 SCC (blue) performance analytics were compared. **A)** Average time (sec) to quantify Cfos-IR  
495 cells per image (1920 x 1460 pixels), n = 30 images per automated method. **B)** Average time  
496 (sec) as a function of image size (pixels) to quantify the number of Cfos-IR cells per image, n =  
497 30 images per automated method. Inset displays data for SCC only. **C)** Average absolute error  
498 per image where:  $ABS(Manual\ counts - Automated\ counts)$  as the binary threshold value  
499 approaches the mean pixel intensity of the image, n = 15 images per threshold factor. Inset  
500 displays data for SCC only.

501  
502 **Figure 5: Overfitting Analysis.** SCC evaluated multiple sets of data including fabricated Cfos  
503 images and non-neuronal cell types *S. aureus* and *E. coli* to test the generalizability of our  
504 algorithm. Ground truth was defined as: the number of known Cfos-IR cells that meet threshold,  
505 size, and circularity criterion on fabricated Cfos images (**A-C**) and the number of cells per image  
506 counted by OCFU (**D-I**). OCFU was trained on these two datasets, meaning it is accurate,  
507 thereby making it “ground truth”. Ground truth (white bars), SCC (blue bars). **A)** Representative  
508 image of fabricated Cfos cells, **B)** Average number of cells counted by ground truth vs SCC, n =  
509 15 images, **C)** Ground truth counts correlated with SCC counts resulted in  $p < 0.001$  and  
510 regression of  $y = 0.991x - 0.82$ , **D)** Representative image of *S. aureus*, **E)** Average number of  
511 cells counted by manual vs SCC, n = 14 images, **F)** Ground truth counts correlated with SCC

512 counts resulted in  $p < 0.001$  and regression of  $y = 0.968x + 0.10$ , **G**) Representative image of *E.*  
513 *coli*, **H**) Average number of ground truth cells vs SCC counts,  $n = 15$  images, **I**) Ground truth  
514 counts correlated with SCC counts resulted in,  $p < 0.001$  and regression of  $y = 0.943x + 0.39$ .

# FIGURE 1

| <b>A</b>      | <b>Threshold</b> | <b>Size</b>   | <b>Circularity</b> |
|---------------|------------------|---------------|--------------------|
| <b>Manual</b> | 115              | Visually      | Visually           |
| <b>OCFU</b>   | 115              | 10 pix radius | NA                 |
| <b>IMJM</b>   | 115              | 10 pix radius | 0.80               |
| <b>SCC</b>    | 115              | 10 pix radius | 0.80               |

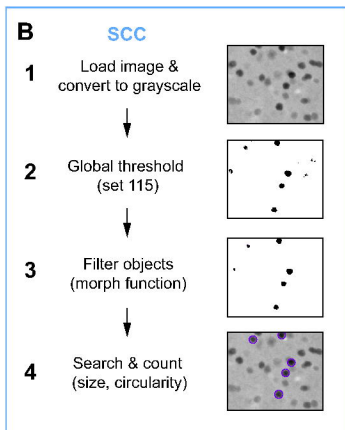

**FIGURE 2**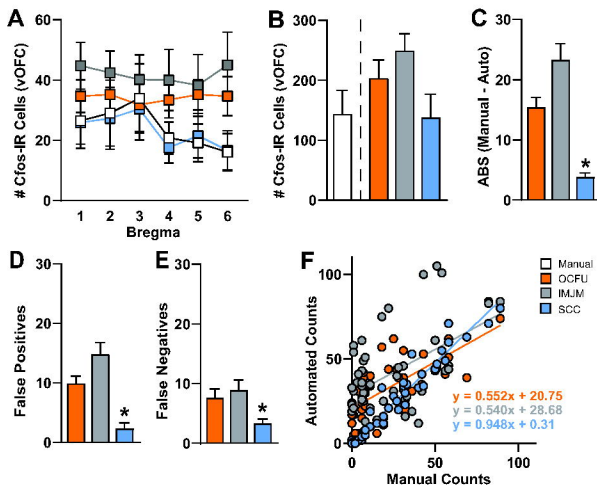

# FIGURE 3

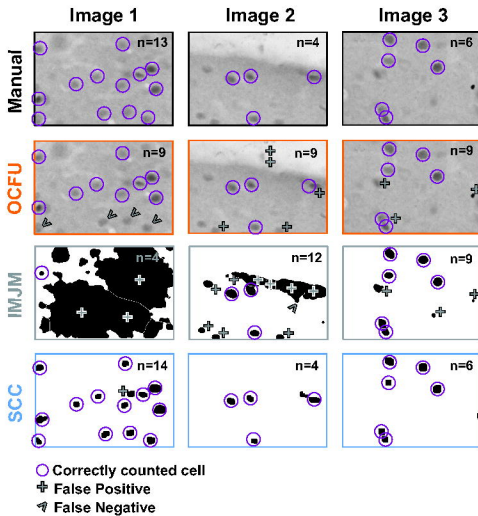



**FIGURE 4**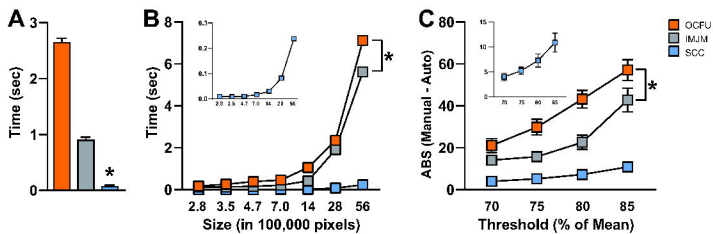

**FIGURE 5**

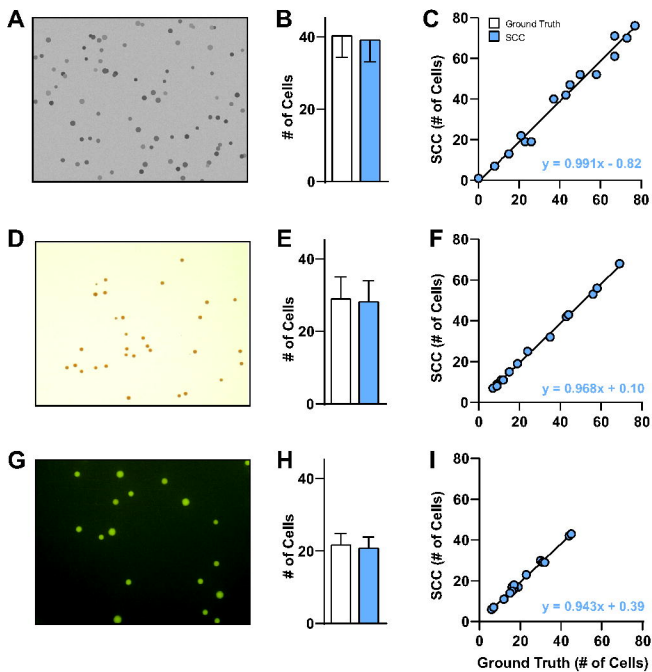

Source: https://www.biorxiv.org/content/10.1101/2020.02.22.960948v1.full.pdf
